# Supplementary material for: The role of monocyte chemoattractant protein-1 (MCP-1) as an immunological marker for patients with leprosy: a systematic literature review
Source: PeerJ journal article supplement (doi:10.7717/peerj.17400), 2024-06-18
Supplement: Quality_Assessment.xlsx [file Quality_Assessment.xlsx]

## Sheet: NOS MCP-1
No (Cross Sectional)	Title	Study Id	Selection				Comparability	Outcome
			Representativeness of sample	Sample size	Non-response rate	Ascertainment of the screening/surveillance tool	The potential confounders were investigated by subgroup analysis or multivariable analysis	Assessment of outcome	Statistical test		Total Score
1	Plasma levels of chemokines during leprosy specific treatment	Mendonca et al., (2009)	1	1	1	1	0	2	1		7
2	Enhancing Sensitivity of Detection of Immune Responses to Mycobacterium leprae Peptides in Whole-Blood Assays	Geluk et al., (2010)	1	1	1	1	0	2	1		7
3	Urinary monocyte chemotactic protein-1 (MCP-1) in leprosy patients : increased risk for kidney damage	Meneses et al., (2014)	1	1	1	2	0	1	1		7
4	CXCL10, MCP-1, and Other Immunologic Markers Involved in Neural Leprosy	Medeiros et al., (2015)	1	1	1	2	0	2	1		8
5	STING-Dependent 2′-5′ Oligoadenylate Synthetase–Like Production Is Required for Intracellular Mycobacterium leprae Survival	Toledo-Pinto et al., 2016	1	1	1	2	0	2	1		8
6	Cytokine Levels in Neural Pain in Leprosy	Moraes Angst et al., (2020)	1	1	0	2	1	2	1		8
7	TLR-9 Plays a Role in Mycobacterium leprae-Induced Innate Immune Activation of A549 Alveolar Epithelial Cells	Dias et al., (2021)	1	1	1	1	0	2	1		7
8	Interplay among differential exposure to Mycobacterium leprae and TLR4 polymorphism	Cunha et al., (2023)	1	1	0	2	0	2	1		7
No (Case Control)	Title	Study Id	Selection				Comparability	Outcome
			Is the case definition adequate	Representativeness of the cases	Selection of controls	Definition of controls	Comparability of cases and controls on the basis of the design or analysis controlled for confounders	Ascertainment of exposure	Same method of ascertainment for cases and controls	Non-response rate	Total Score
1	Potential plasma markers of type 1 and type 2 leprosy reactions: a preliminary report	Stefani et al., (2009)	1	1	1	1	1	0	1	1	7
2	Peptides Derived from Mycobacterium leprae ML1601c Discriminate between Leprosy Patients and Healthy Endemic Controls	Bobosha et al., (2012)	1	1	1	1	1	0	1	1	7
3	Polymorphisms in genes TLR1, 2 and 4 are associated with differential cytokine and chemokine serum production in patients with leprosy	Santana et al., (2017)	1	1	1	1	2	0	1	1	8
4	Association of CC-chemokine ligand-2 gene polymorphisms with leprosy reactions	Biswas et al., 2024	1	1	1	1	1	0	1	1	7
No (Cohort)	Title	Study Id	Selection				Comparability	Outcome
			Representativeness of the exposed cohort	Selection of the non-exposed cohort	Ascertainment of exposure	Demonstration that outcome of interest was not present at start of study	Comparability of cohorts on the basis of the design or analysis controlled for confounders	Assessment of outcome	Was follow-up long enough for outcomes to occur	Adequacy of follow-up of cohorts	Total Score
1	New Biomarkers with Relevance to Leprosy Diagnosis Applicable in Areas Hyperendemic for Leprosy	Geluk et al., (2012)	1	1	0	1	1	1	1	0	6
2	Interruption of persistent exposure to leprosy combined or not with recent BCG vaccination enhances the response to Mycobacterium leprae specific antigens	de Carvalho et al., 2017	1	1	0	1	1	0	1	1	8
3	Whole blood RNA signatures in leprosy patients identify reversal reactions before clinical onset: a prospective, multicenter study	Tio-Coma et al., (2019)	1	1	0	1	1	1	1	1	7
4	CCL2 and IFN-γ serum levels as biomarkers for subclinical infection in household contacts of leprosy patients	Queiroz et al., (2020)	1	1	0	1	2	1	1	1	8
5	Transcriptomic Analysis of Mycobacterium leprae-Stimulated Response in Peripheral Blood Mononuclear Cells Reveal Potential Biomarkers for Early Diagnosis of Leprosy	Yuan et al., (2021)	1	1	0	1	2	1	1	0	7
