# Supplementary material for: The role of monocyte chemoattractant protein-1 (MCP-1) as an immunological marker for patients with leprosy: a systematic literature review
Source: PeerJ journal article supplement (doi:10.7717/peerj.17400), 2024-06-18
Supplement: Rationale_for_conducting_the_systematic_review.docx [file Rationale_for_conducting_the_systematic_review.docx]

1. **Rationale for conducting the systematic review**

Leprosy is known for its complex immunological manifestations. Investigating the relationship between MCP-1 and leprosy may shed light on the molecular and cellular mechanisms involved in the pathogenesis of leprosy.1 This can help predict prognosis therefore develop strategies for disease management. A systematic review on MCP-1 and leprosy can aid in evaluating the consistency of findings across various studies and populations, establishing the reliability of MCP-1 as a biomarker for leprosy diagnosis. MCP-1 was found to be utilized to distinguish between different kinds of leprosy. 2–4 Systematic reviews on MCP-1 and leprosy have not been conducted; hence, this systematic review aims to fill the gap, especially regarding various findings in previous experimental studies.

1. **The contribution that the systematic review makes to knowledge in light of previously published related reports**

The current systematic review is the first to systematically synthesis the available experimental work on MCP-1 and leprosy. Findings from previous studies, indicate that MCP-1 showed potential upon diagnosing, differentiating types of leprosy, and predicting reversal reactions’ occurrence. 2–4, 5 However, more studies with larger population are recommended for future studies to ensure MCP-1’ ability to diagnose leprosy and its clinical staging.

**References**

1. Hirai KE, De Sousa JR, Silva LM, Junior LBD, Furlaneto IP, Carneiro FRO, et al. Endoplasmic reticulum stress markers and their possible implications in leprosy’s pathogenesis. Dis Markers. 2018;2018.

2. Gautam S, Sharma D, Goel A, Patil SA, Bisht D. Insights into mycobacterium leprae proteomics and biomarkers—an overview. Vol. 9, Proteomes. MDPI AG; 2021. p. 1–18.

3. Chen X, You YG, Yuan YH, Yuan LC, Wen Y. Host immune responses induced by specific Mycobacterium leprae antigens in an overnight whole-blood assay correlate with the diagnosis of paucibacillary leprosy patients in China. PLoS Negl Trop Dis. 2019;13(4).

4. Yuan YH, Liu J, You YG, Chen XH, Yuan LC, Wen Y, et al. Transcriptomic Analysis of Mycobacterium leprae-Stimulated Response in Peripheral Blood Mononuclear Cells Reveal Potential Biomarkers for Early Diagnosis of Leprosy. Front Cell Infect Microbiol. 2021 Dec 21;11.

5. de Carvalho FM, Rodrigues LS, Duppre NC, Alvim IMP, Ribeiro-Alves M, Pinheiro RO, et al. Interruption of persistent exposure to leprosy combined or not with recent BCG vaccination enhances the response to Mycobacterium leprae specific antigens. PLoS Negl Trop Dis. 2017 May 3;11(5).
